# Supplementary material
Source: PubMed Central journal article supplement (PMC5987191)
Supplement: NIHMS955755-supplement-Supplemental_Digital_Content.pdf [file NIHMS955755-supplement-Supplemental_Digital_Content.pdf]

# eAppendix for: Mediation of neighborhood effects on adolescent substance use by the school and peer environments in a large-scale housing voucher experiment

Kara E. Rudolph, Oleg Sofrygin, Nicole M. Schmidt, Rebecca Crowder,  
M. Maria Glymour, Jennifer Ahern, Theresa L. Osypuk

## Baseline covariates

- Adolescent demographic characteristics: gender (male/female) (for the drug use analytic sample; only boys were included in the cigarette use analytic sample), age, race/ethnicity (categorized as black, latino/Hispanic, white, other), number of family members (categorized as 2, 3, or 4+), MTO city (for the cigarette use analytic sample; only the Boston site was included for the drug use analytic sample).
- Characteristics related to the child's behavior and learning: child was suspended or expelled from school during 2 years prior to baseline, child had gone to a special class or school or had gotten special help in school for a learning problem during 2 years prior to baseline, someone from school asked to discuss problems the child had with schoolwork or behavior during the 2 years prior to baseline, child enrolled in special class for gifted and talented students, child had problems that made it difficult to get to school or play active games/sports, child required special medication or equipment, child ever repeated a grade.
- Adult household head characteristics included: level of education (graduated high school vs not), marital status (never vs ever married), whether had been a teen parent, work status, receipt of AFDC/TANF, car ownership, disability status.
- Neighborhood characteristics: family lived in neighborhood for at least 5 years; felt neighborhood streets were unsafe at night; household member had been assaulted, threatened with a knife or gun, or robbed during the 6 months prior to baseline; chat with a neighbor at least once per week; would likely tell neighbor if neighbor's child was getting into trouble; family living in neighborhood; friends in neighborhood; very dissatisfied with neighborhood; poverty level of neighborhood.
- Reported reasons for participating in MTO: to get away from drugs or gangs, to have access to better schools.

- Moving-related characteristics: confidence about finding an apartment in a different part of the city, moved more than 3 times during the 5 years prior to baseline, and previous application for Section 8 voucher.

### Total effect estimates by gender and site

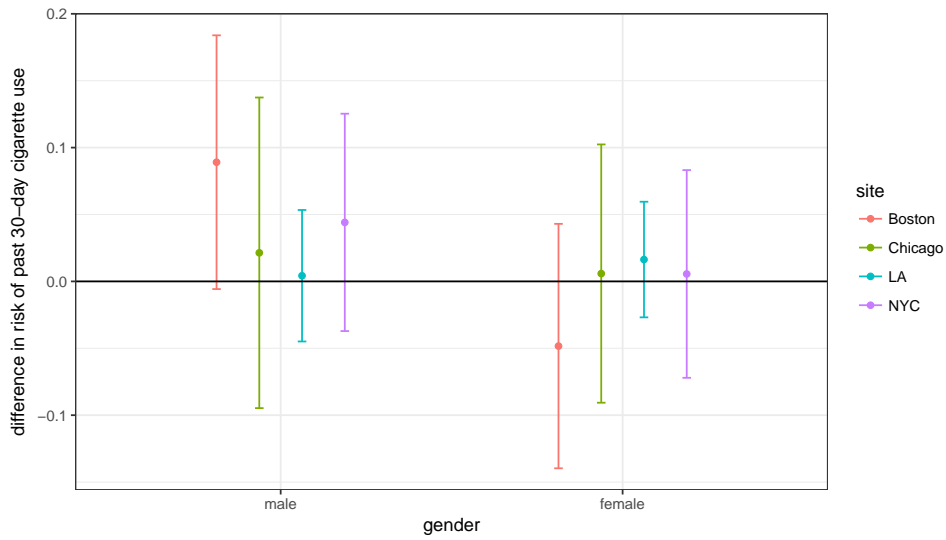

eFigure 1: Estimates and 95% confidence intervals for the total effect of voucher randomization on past 30-day cigarette use by gender and site. Data from the Moving to Opportunity experiment, interim follow up.

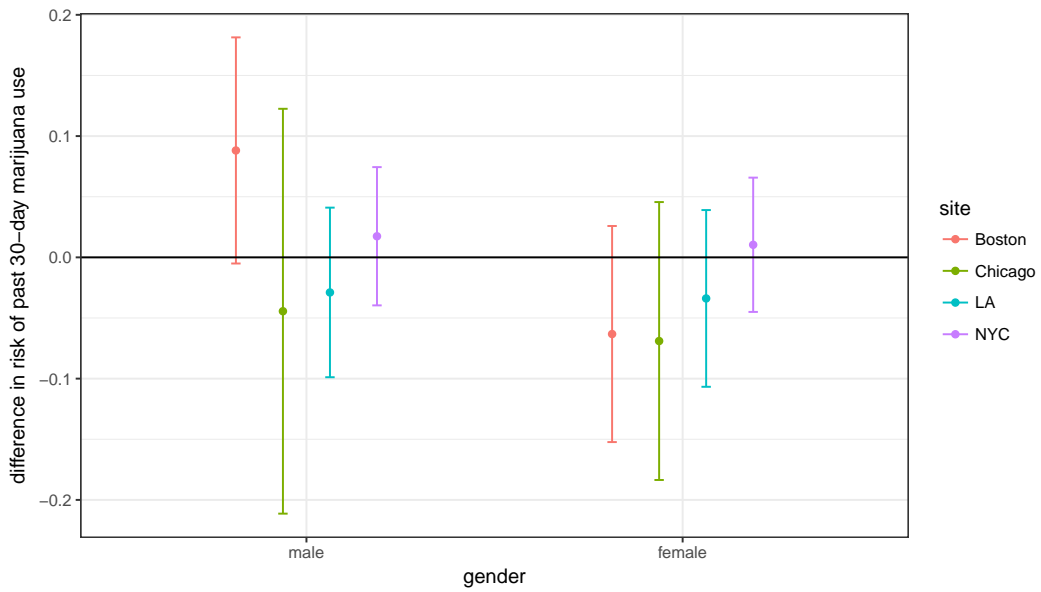

eFigure 2: Estimates and 95% confidence intervals for the total effect of voucher randomization on past 30-day marijuana use by gender and site. Data from the Moving to Opportunity experiment, interim follow up.

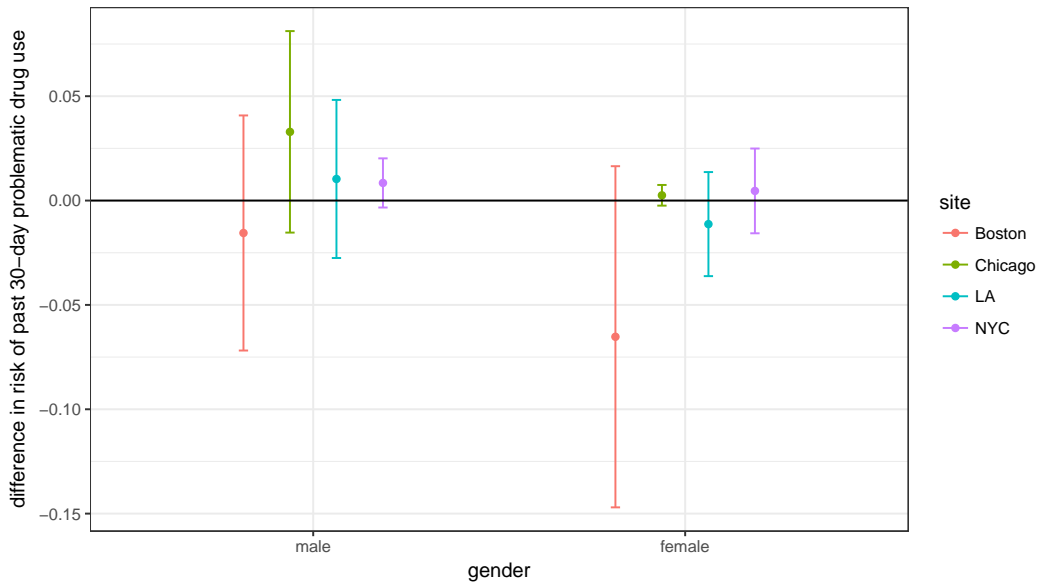

eFigure 3: Estimates and 95% confidence intervals for the total effect of voucher randomization on past 30-day problematic drug use by gender and site. Data from the Moving to Opportunity experiment, interim follow up.

## Baseline and follow-up characteristics by randomization status for each analytic sample

eTable 1: Characteristics by randomization status for the cigarette use sample, survey weighted and combined across 30 imputed datasets. Percentages unless otherwise specified.

|                                                    | Boys, N=664 |         | Girls, N=997 |         |
|----------------------------------------------------|-------------|---------|--------------|---------|
|                                                    | Control     | Voucher | Control      | Voucher |
| Parent baseline characteristics                    |             |         |              |         |
| Boston                                             | 28.19       | 24.65   | 25.31        | 24.29   |
| Chicago                                            | 36.99       | 37.48   | 23.94        | 24.99   |
| LA                                                 | 0           | 0       | 22.71        | 19.21   |
| NYC                                                | 34.82       | 37.87   | 28.04        | 31.51   |
| High school graduate or GED                        | 40.40       | 39.87   | 35.17        | 35.89   |
| Never married                                      | 57.06       | 57.85   | 55.87        | 52.57   |
| Teen at birth of first child                       | 21.98       | 22.84   | 20.80        | 24.88   |
| Working                                            | 27.60       | 26.41   | 23.35        | 27.38   |
| Welfare receipt                                    | 80.05       | 75.55   | 75.74        | 72.36   |
| Car                                                | 15.66       | 13.60   | 21.04        | 21.70   |
| Household member with disability                   | 19.86       | 20.11   | 17.53        | 19.68   |
| 2 household members                                | 7.37        | 6.09    | 7.14         | 8.21    |
| 3 household members                                | 25.58       | 23.46   | 20.92        | 21.75   |
| 4 household members                                | 20.43       | 22.85   | 23.57        | 28.16   |
| Household member victim of a crime                 | 38.61       | 43.19   | 44.25        | 41.56   |
| Lived in neighborhood for 5 years                  | 63.86       | 66.55   | 69.18        | 69.70   |
| Chat with neighbors                                | 57.05       | 51.63   | 50.70        | 45.23   |
| Would tell family if neighbor's kid was in trouble | 60.53       | 56.52   | 50.59        | 54.08   |
| No family in neighborhood                          | 60.65       | 62.93   | 68.49        | 63.76   |
| No friends in neighborhood                         | 39.85       | 38.92   | 38.61        | 39.10   |
| Feel safe at night in neighborhood                 | 44.24       | 44.60   | 47.93        | 45.40   |
| Very dissatisfied with neighborhood                | 45.86       | 48.12   | 43.45        | 42.36   |
| Adolescent baseline characteristics                |             |         |              |         |
| Age, years                                         | 9.08        | 9.30    | 9.36         | 9.24    |
| Black                                              | 64.13       | 66.40   | 54.86        | 54.21   |
| Hispanic                                           | 35.22       | 33.13   | 27.88        | 31.96   |
| White/Other                                        | 0.65        | 0.47    | 17.25        | 13.82   |
| Behavioral problems                                | 9.35        | 12.28   | 2.09         | 5.68    |
| Ever been expelled                                 | 6.84        | 13.25   | 3.26         | 5.13    |
| Enrolled in gifted programs                        | 19.96       | 17.73   | 12.59        | 14.06   |
| Learning problems                                  | 23.31       | 23.69   | 12.63        | 11.94   |
| School has called about problems                   | 38.80       | 36.46   | 14.66        | 16.39   |
| Conditions that prevent school attendance or play  | 5.60        | 8.85    | 4.81         | 6.10    |
| Special medicine                                   | 10.85       | 13.91   | 5.34         | 7.46    |
| Ever repeated a grade                              | 33.32       | 34.06   | 25.31        | 23.99   |
| Adolescent follow-up characteristics               |             |         |              |         |
| Moved with the voucher                             | 0.00        | 41.67   | 0.00         | 51.76   |
| Positive school climate                            | 77.34       | 73.00   | 73.67        | 69.25   |
| Feels safe at school                               | 76.15       | 75.40   | 78.04        | 77.83   |
| Has friends who use drugs                          | 26.09       | 27.73   | 19.70        | 26.46   |
| Participates in after-school sport or club         | 16.97       | 15.21   | 4.12         | 8.34    |
| Cigarette use                                      | 6.74        | 11.78   | 7.61         | 7.37    |

eTable 2: Characteristics by randomization status for the marijuana use sample, survey weighted and combined across 30 imputed datasets. Percentages unless otherwise specified.

|                                                    | Boys, N=640 |         | Girls, N=507 |         |
|----------------------------------------------------|-------------|---------|--------------|---------|
|                                                    | Control     | Voucher | Control      | Voucher |
| Parent baseline characteristics                    |             |         |              |         |
| Boston                                             | 27.94       | 27.29   | 50.82        | 49.65   |
| Chicago                                            | 0           | 0       | 49.18        | 50.35   |
| LA                                                 | 37.55       | 30.07   | 0            | 0       |
| NYC                                                | 34.51       | 42.64   | 0            | 0       |
| High school graduate or GED                        | 36.95       | 36.90   | 38.87        | 41.69   |
| Never married                                      | 50.61       | 49.79   | 63.12        | 58.61   |
| Teen at birth of first child                       | 19.23       | 18.83   | 17.34        | 27.79   |
| Working                                            | 24.93       | 25.39   | 28.29        | 32.77   |
| Welfare receipt                                    | 77.55       | 72.66   | 71.57        | 68.44   |
| Car                                                | 23.86       | 24.27   | 18.99        | 21.84   |
| Household member with disability                   | 20.04       | 20.03   | 14.78        | 19.58   |
| 2 household members                                | 5.69        | 5.42    | 7.81         | 9.38    |
| 3 household members                                | 23.03       | 26.27   | 22.46        | 24.04   |
| 4 household members                                | 19.11       | 26.12   | 24.96        | 26.18   |
| Household member victim of a crime                 | 38.57       | 46.42   | 30.69        | 33.83   |
| Lived in neighborhood for 5 years                  | 65.66       | 65.44   | 64.39        | 64.86   |
| Chat with neighbors                                | 54.82       | 52.55   | 53.70        | 46.97   |
| Would tell family if neighbor's kid was in trouble | 61.08       | 58.40   | 52.33        | 57.04   |
| No family in neighborhood                          | 68.94       | 66.15   | 67.10        | 55.11   |
| No friends in neighborhood                         | 37.50       | 35.62   | 40.75        | 33.69   |
| Feel safe at night in neighborhood                 | 49.95       | 49.11   | 39.73        | 35.82   |
| Very dissatisfied with neighborhood                | 36.92       | 45.06   | 41.15        | 35.68   |
| Adolescent baseline characteristics                |             |         |              |         |
| Age, years                                         | 9.29        | 9.35    | 9.09         | 9.03    |
| Black                                              | 43.56       | 46.87   | 62.81        | 65.31   |
| Hispanic                                           | 55.80       | 53.13   | 11.84        | 18.11   |
| White/Other                                        | 0.64        | 0       | 25.34        | 16.58   |
| Behavioral problems                                | 9.41        | 12.10   | 2.12         | 5.24    |
| Ever been expelled                                 | 7.20        | 12.58   | 2.64         | 6.89    |
| Enrolled in gifted programs                        | 20.66       | 16.91   | 9.41         | 11.00   |
| Learning problems                                  | 24.36       | 23.57   | 15.79        | 10.57   |
| School has called about problems                   | 38.65       | 34.47   | 10.51        | 16.52   |
| Conditions that prevent school attendance or play  | 4.72        | 9.78    | 4.81         | 4.93    |
| Special medicine                                   | 10.93       | 16.37   | 5.36         | 9.82    |
| Ever repeated a grade                              | 28.04       | 31.15   | 29.94        | 25.29   |
| Adolescent follow-up characteristics               |             |         |              |         |
| Moved with the voucher                             | 0.00        | 48.94   | 0.00         | 48.58   |
| Positive school climate                            | 70.33       | 69.64   | 77.83        | 69.32   |
| Feels safe at school                               | 68.78       | 72.55   | 77.53        | 80.35   |
| Has friends who use drugs                          | 26.22       | 30.09   | 18.63        | 31.88   |
| Participates in after-school sport or club         | 19.25       | 15.82   | 3.81         | 8.84    |
| Marijuana use                                      | 5.36        | 7.80    | 12.08        | 5.15    |

eTable 3: Characteristics by randomization status for the problematic drug use sample, survey weighted and combined across 30 imputed datasets. Percentages unless otherwise specified.

|                                                    | Boys, N=861 |         | Girls, N=731 |         |
|----------------------------------------------------|-------------|---------|--------------|---------|
|                                                    | Control     | Voucher | Control      | Voucher |
| Parent baseline characteristics                    |             |         |              |         |
| Boston                                             | 20.49       | 19.25   | 0            | 0       |
| Chicago                                            | 26.89       | 29.63   | 32.16        | 32.81   |
| LA                                                 | 27.54       | 21.11   | 30.72        | 25.41   |
| NYC                                                | 25.08       | 30.00   | 37.12        | 41.79   |
| High school graduate or GED                        | 38.50       | 38.08   | 33.73        | 34.14   |
| Never married                                      | 57.34       | 55.91   | 57.78        | 53.07   |
| Teen at birth of first child                       | 25.37       | 22.90   | 22.91        | 27.99   |
| Working                                            | 25.53       | 25.99   | 19.09        | 25.11   |
| Welfare receipt                                    | 79.67       | 75.22   | 82.57        | 76.76   |
| Car                                                | 21.87       | 21.34   | 21.86        | 19.79   |
| Household member with disability                   | 17.80       | 17.75   | 17.80        | 19.00   |
| 2 household members                                | 7.00        | 5.07    | 7.59         | 7.07    |
| 3 household members                                | 21.45       | 23.13   | 19.19        | 19.93   |
| 4 household members                                | 18.84       | 23.14   | 23.34        | 28.36   |
| Household member victim of a crime                 | 39.27       | 45.95   | 50.95        | 45.55   |
| Lived in neighborhood for 5 years                  | 65.16       | 68.17   | 70.77        | 75.06   |
| Chat with neighbors                                | 55.86       | 52.09   | 49.18        | 45.64   |
| Would tell family if neighbor's kid was in trouble | 59.60       | 55.90   | 47.78        | 56.38   |
| No family in neighborhood                          | 60.99       | 61.81   | 65.41        | 62.60   |
| No friends in neighborhood                         | 36.73       | 34.58   | 35.45        | 40.64   |
| Feel safe at night in neighborhood                 | 48.46       | 47.35   | 50.51        | 50.01   |
| Very dissatisfied with neighborhood                | 41.24       | 46.87   | 44.07        | 45.07   |
| Adolescent baseline characteristics                |             |         |              |         |
| Age, years                                         | 9.19        | 9.28    | 9.53         | 9.32    |
| Black                                              | 58.46       | 61.85   | 63.29        | 60.90   |
| Hispanic                                           | 41.07       | 37.91   | 28.94        | 31.17   |
| White/Other                                        | 0.47        | 0.24    | 7.77         | 7.93    |
| Behavioral problems                                | 8.37        | 11.65   | 2.57         | 6.13    |
| Ever been expelled                                 | 9.23        | 13.45   | 3.91         | 4.92    |
| Enrolled in gifted programs                        | 20.33       | 16.54   | 11.90        | 14.96   |
| Learning problems                                  | 23.70       | 22.55   | 9.42         | 11.78   |
| School has called about problems                   | 37.67       | 34.25   | 17.42        | 16.06   |
| Conditions that prevent school attendance or play  | 4.88        | 8.73    | 4.13         | 5.64    |
| Special medicine                                   | 9.12        | 12.94   | 5.26         | 5.82    |
| Ever repeated a grade                              | 27.95       | 30.01   | 24.46        | 23.70   |
| Adolescent follow-up characteristics               |             |         |              |         |
| Moved with the voucher                             | 0.00        | 48.94   | 0.00         | 48.58   |
| Positive school climate                            | 72.41       | 72.50   | 72.37        | 71.20   |
| Feels safe at school                               | 71.39       | 74.87   | 78.30        | 76.26   |
| Has friends who use drugs                          | 24.83       | 27.73   | 19.24        | 21.80   |
| Participates in after-school sport or club         | 16.80       | 15.04   | 2.98         | 7.23    |
| Problematic drug use                               | 1.97        | 2.99    | 0.80         | 0.74    |

## Sensitivity analyses subgroups

eTable 4: Site subgroups for each sensitivity analysis.

| Sample                  | Sensitivity Analysis 1 |                     | Sensitivity Analysis 2 |                     | Sensitivity Analysis 3 |       |
|-------------------------|------------------------|---------------------|------------------------|---------------------|------------------------|-------|
|                         | Boys                   | Girls               | Boys                   | Girls               | Boys                   | Girls |
| Cigarette Use           | Boston,<br>Chicago     | All                 | All                    | All                 | All                    | All   |
| Marijuana<br>Use        | Boston,<br>Chicago     | All                 | Chicago, LA            | All                 | All                    | All   |
| Problematic<br>Drug Use | Boston,<br>Chicago, LA | Chicago,<br>LA, NYC | All                    | Chicago,<br>LA, NYC | All                    | All   |

## First-stage effects for sensitivity analyses

eTable 5: Risk differences of the effect of voucher receipt on the mediator by outcome sample for Sensitivity Analysis 1 that compares the restricted voucher group to the control group. Marginal effects, adjusting for baseline covariates and adherence,  $Z$ .

| Mediator                                   | Boys<br>RD (95% CI)    | Girls<br>RD (95% CI)    |
|--------------------------------------------|------------------------|-------------------------|
| <b>Cigarette Use Sample</b>                |                        |                         |
| Feels safe at school                       | 0.060 (0.039, 0.081)   | 0.001 (-0.002, 0.005)   |
| Positive school climate                    | 0.037 (0.013, 0.061)   | -0.008 (-0.012, -0.005) |
| Participates in after-school sport or club | 0.008 (-0.002, 0.017)  | 0.006 (0.005, 0.008)    |
| Has friends who use drugs                  | -0.011 (-0.039, 0.016) | 0.032 (0.019, 0.044)    |
| <b>Marijuana Use Sample</b>                |                        |                         |
| Feels safe at school                       | 0.058 (0.041, 0.074)   | 0.000 (-0.003, 0.004)   |
| Positive school climate                    | 0.037 (0.016, 0.058)   | -0.007 (-0.010, -0.004) |
| Participates in after-school sport or club | 0.009 (-0.001, 0.018)  | 0.006 (0.005, 0.007)    |
| Has friends who use drugs                  | -0.011 (-0.038, 0.017) | 0.034 (0.021, 0.047)    |
| <b>Problematic Drug Use Sample</b>         |                        |                         |
| Feels safe at school                       | 0.051 (0.041, 0.062)   | -0.028 (-0.032, -0.025) |
| Positive school climate                    | 0.036 (0.026, 0.046)   | -0.008 (-0.011, -0.004) |
| Participates in after-school sport or club | 0.008 (0.003, 0.012)   | 0.003 (0.002, 0.004)    |
| Has friends who use drugs                  | 0.018 (0.001, 0.034)   | 0.032 (0.019, 0.044)    |

eTable 6: Risk differences of the effect of voucher receipt on the mediator by outcome sample for Sensitivity Analysis 2 that uses lifetime outcomes. Marginal effects, adjusting for baseline covariates and adherence,  $Z$ .

| Mediator                                   | Boys<br>RD (95% CI)    | Girls<br>RD (95% CI)    |
|--------------------------------------------|------------------------|-------------------------|
| <b>Cigarette Use Sample</b>                |                        |                         |
| Feels safe at school                       | 0.032 (0.025, 0.040)   | 0.003 (-0.001, 0.006)   |
| Positive school climate                    | 0.037 (0.029, 0.044)   | -0.006 (-0.010, -0.003) |
| Participates in after-school sport or club | -0.003 (-0.006, 0.000) | 0.006 (0.005, 0.008)    |
| Has friends who use drugs                  | 0.012 (-0.003, 0.027)  | 0.033 (0.020, 0.045)    |
| <b>Marijuana Use Sample</b>                |                        |                         |
| Feels safe at school                       | 0.040 (0.023, 0.057)   | 0.001 (-0.002, 0.005)   |
| Positive school climate                    | 0.037 (0.015, 0.058)   | -0.006 (-0.009, -0.003) |
| Participates in after-school sport or club | 0.005 (-0.000, 0.011)  | 0.006 (0.005, 0.007)    |
| Has friends who use drugs                  | 0.018 (-0.003, 0.040)  | 0.034 (0.021, 0.047)    |
| <b>Problematic Drug Use Sample</b>         |                        |                         |
| Feels safe at school                       | 0.031 (0.024, 0.039)   | -0.027 (-0.030, -0.023) |
| Positive school climate                    | 0.035 (0.028, 0.042)   | -0.006 (-0.009, -0.002) |
| Participates in after-school sport or club | -0.002 (-0.005, 0.000) | 0.003 (0.002, 0.004)    |
| Has friends who use drugs                  | 0.014 (-0.001, 0.028)  | 0.034 (0.021, 0.046)    |

eTable 7: Risk differences of the effect of voucher receipt on the mediator for Sensitivity Analysis 3 that includes all sites. Marginal effects, adjusting for baseline covariates and adherence,  $Z$ .

| Mediator                                   | Boys<br>RD (95% CI)    | Girls<br>RD (95% CI)    |
|--------------------------------------------|------------------------|-------------------------|
| Feels safe at school                       | 0.031 (0.023, 0.038)   | 0.001 (-0.002, 0.005)   |
| Positive school climate                    | 0.035 (0.028, 0.042)   | -0.008 (-0.012, -0.005) |
| Participates in after-school sport or club | -0.003 (-0.006, 0.000) | 0.006 (0.005, 0.008)    |
| Has friends who use drugs                  | 0.011 (-0.003, 0.026)  | 0.031 (0.019, 0.044)    |



## Stochastic direct and indirect effects for main analysis

eTable 8: Data-dependent stochastic direct (SDE) and indirect effect (SIE) estimates and 95% confidence intervals on substance use outcomes by mediator and gender, contrasting the voucher group to the control group.

| Estimand             | Mediator                | Gender | RD (95% CI)             |
|----------------------|-------------------------|--------|-------------------------|
| Cigarette Use        |                         |        |                         |
| SDE                  | safe at school          | male   | 4.227 (-4.526, 12.981)  |
| SDE                  | positive school climate | male   | 4.024 (-4.276, 12.325)  |
| SDE                  | in sports or clubs      | male   | 3.548 (-4.756, 11.852)  |
| SDE                  | peer drug use           | male   | 3.580 (-5.217, 12.376)  |
| SDE                  | safe at school          | female | -0.590 (-6.345, 5.164)  |
| SDE                  | positive school climate | female | -0.197 (-6.024, 5.631)  |
| SDE                  | in sports or clubs      | female | -0.511 (-6.422, 5.399)  |
| SDE                  | peer drug use           | female | -0.593 (-6.511, 5.324)  |
| SIE                  | safe at school          | male   | -0.348 (-0.921, 0.225)  |
| SIE                  | positive school climate | male   | -0.280 (-0.713, 0.154)  |
| SIE                  | in sports or clubs      | male   | 0.027 (-0.002, 0.055)   |
| SIE                  | peer drug use           | male   | -0.026 (-0.074, 0.022)  |
| SIE                  | safe at school          | female | -0.000 (-0.010, 0.010)  |
| SIE                  | positive school climate | female | 0.032 (-0.041, 0.104)   |
| SIE                  | in sports or clubs      | female | 0.035 (-0.111, 0.180)   |
| SIE                  | peer drug use           | female | 0.419 (0.111, 0.727)    |
| Marijuana Use        |                         |        |                         |
| SDE                  | safe at school          | male   | 1.421 (-4.734, 7.576)   |
| SDE                  | positive school climate | male   | 1.663 (-4.531, 7.857)   |
| SDE                  | in sports or clubs      | male   | 1.296 (-4.797, 7.389)   |
| SDE                  | peer drug use           | male   | 1.235 (-5.156, 7.626)   |
| SDE                  | safe at school          | female | -6.366 (-16.236, 3.504) |
| SDE                  | positive school climate | female | -6.064 (-16.006, 3.878) |
| SDE                  | in sports or clubs      | female | -5.425 (-15.205, 4.354) |
| SDE                  | peer drug use           | female | -5.585 (-15.734, 4.564) |
| SIE                  | safe at school          | male   | -0.066 (-0.358, 0.225)  |
| SIE                  | positive school climate | male   | -0.128 (-0.538, 0.283)  |
| SIE                  | in sports or clubs      | male   | 0.040 (-0.021, 0.101)   |
| SIE                  | peer drug use           | male   | 0.452 (0.118, 0.785)    |
| SIE                  | safe at school          | female | 0.113 (-0.028, 0.253)   |
| SIE                  | positive school climate | female | -0.051 (-0.132, 0.029)  |
| SIE                  | in sports or clubs      | female | -0.003 (-0.010, 0.003)  |
| SIE                  | peer drug use           | female | 0.370 (-0.157, 0.898)   |
| Problematic Drug Use |                         |        |                         |
| SDE                  | safe at school          | male   | 0.484 (-2.595, 3.563)   |
| SDE                  | positive school climate | male   | 0.718 (-2.476, 3.913)   |
| SDE                  | in sports or clubs      | male   | 0.934 (-2.068, 3.936)   |
| SDE                  | peer drug use           | male   | 0.185 (-3.047, 3.417)   |
| SDE                  | safe at school          | female | 0.144 (-1.282, 1.570)   |
| SDE                  | positive school climate | female | 0.180 (-1.279, 1.639)   |
| SDE                  | in sports or clubs      | female | -0.201 (-1.895, 1.494)  |
| SDE                  | peer drug use           | female | -0.138 (-1.866, 1.590)  |
| SIE                  | safe at school          | male   | -0.016 (-0.149, 0.116)  |
| SIE                  | positive school climate | male   | -0.047 (-0.254, 0.161)  |
| SIE                  | in sports or clubs      | male   | 0.008 (0.001, 0.015)    |
| SIE                  | peer drug use           | male   | 0.071 (-0.009, 0.150)   |
| SIE                  | safe at school          | female | 0.036 (-0.056, 0.128)   |
| SIE                  | positive school climate | female | 0.002 (-0.017, 0.021)   |
| SIE                  | in sports or clubs      | female | -0.002 (-0.005, 0.001)  |
| SIE                  | peer drug use           | female | 0.100 (-0.033, 0.234)   |

## Stochastic direct and indirect effects for sensitivity analyses

### Sensitivity Analysis 1: comparing the restricted voucher group to the control group

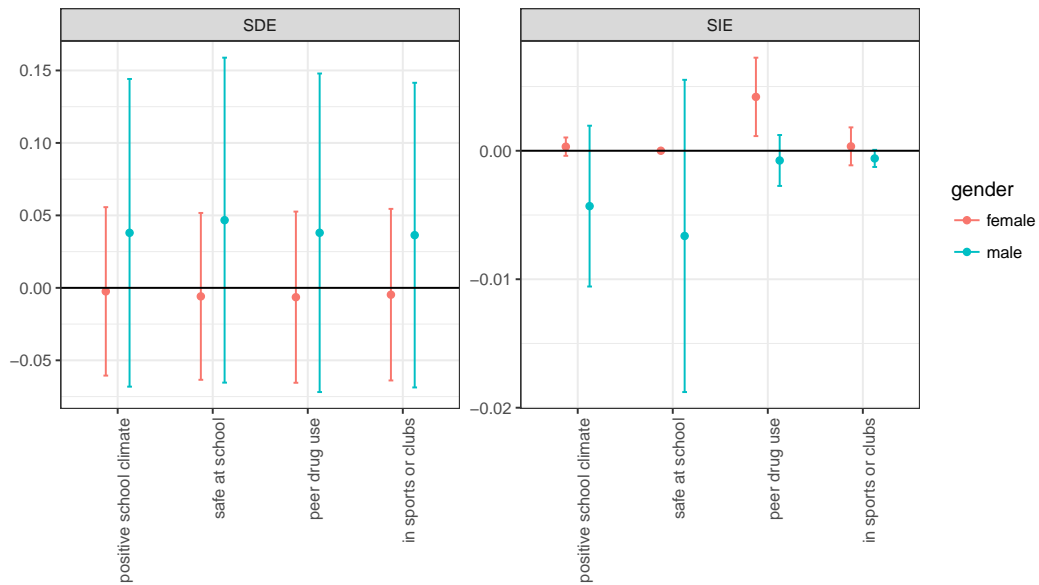

eFigure 4: Data-dependent stochastic direct (SDE) and indirect effect (SIE) estimates and 95% confidence intervals on past 30-day cigarette use by mediator, contrasting the restricted voucher group to the control group.

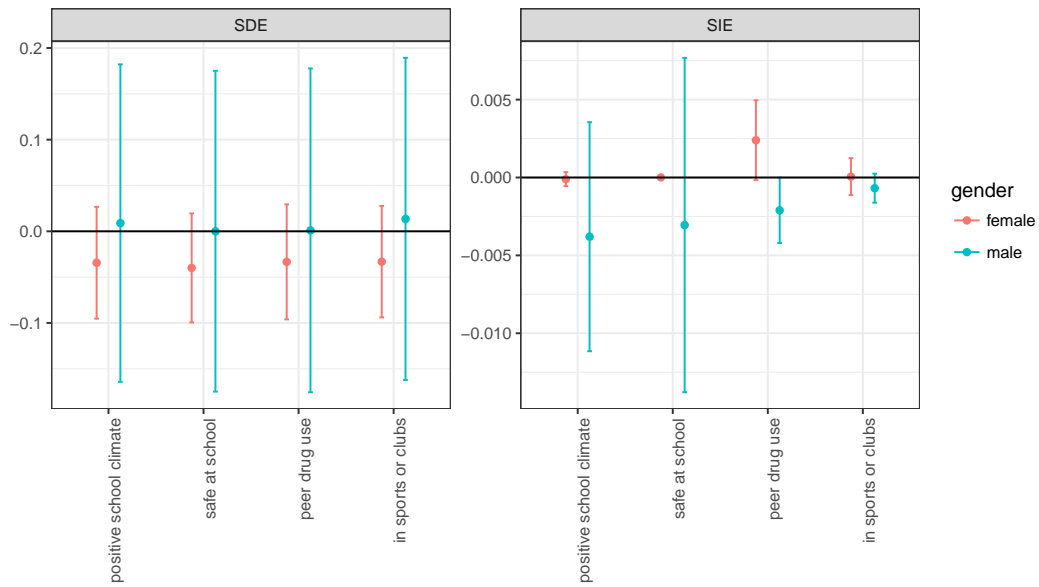

eFigure 5: Data-dependent stochastic direct (SDE) and indirect effect (SIE) estimates and 95% confidence intervals on past 30-day marijuana use by mediator, contrasting the restricted voucher group to the control group.

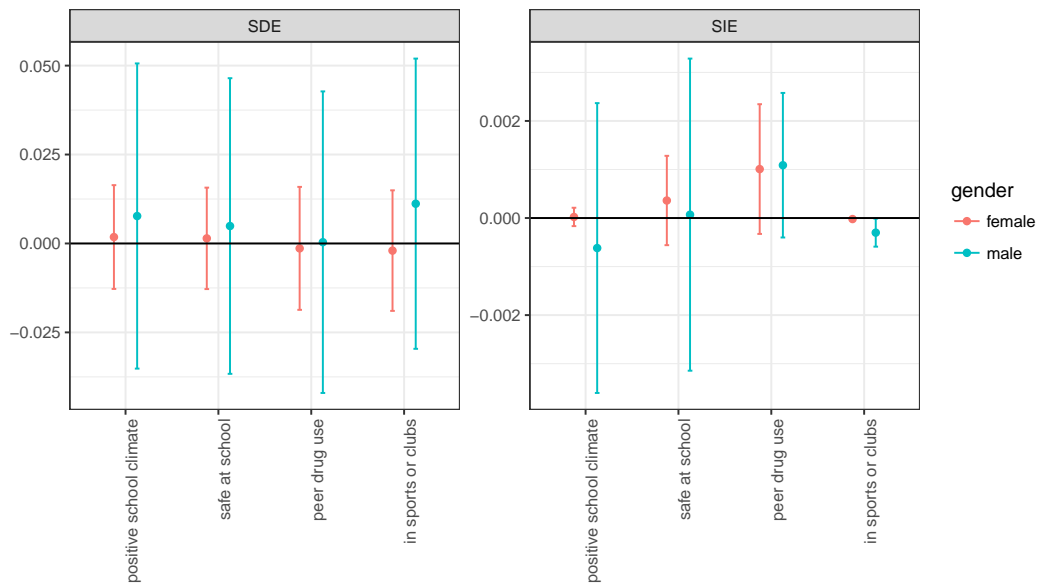

eFigure 6: Data-dependent stochastic direct (SDE) and indirect effect (SIE) estimates and 95% confidence intervals on past 30-day problematic drug use by mediator, contrasting the restricted voucher group to the control group.

## Sensitivity Analysis 2: lifetime outcome measures

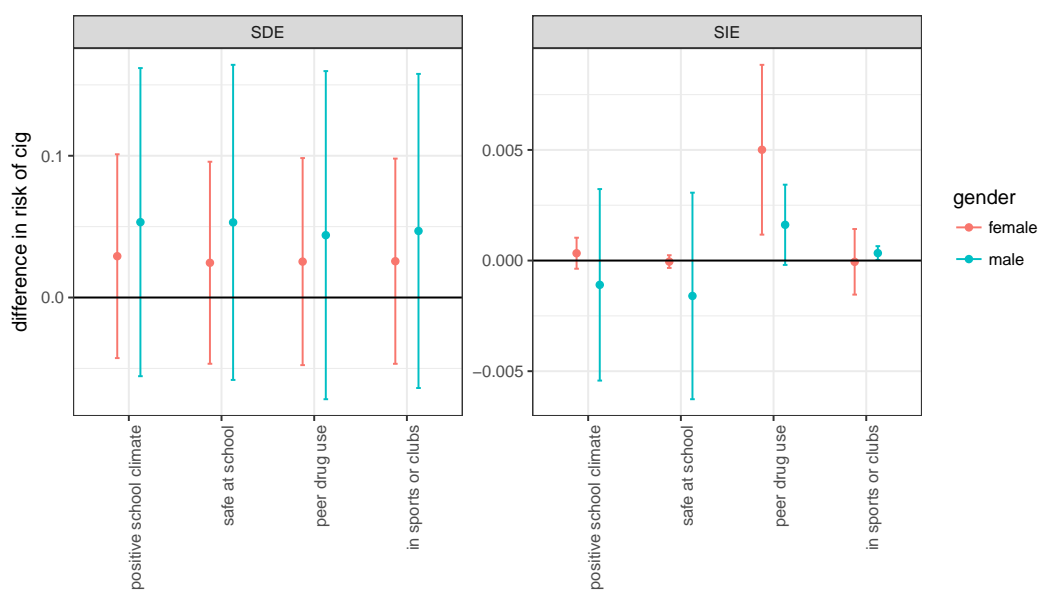

eFigure 7: Data-dependent stochastic direct (SDE) and indirect effect (SIE) estimates and 95% confidence intervals on any cigarette use by mediator.

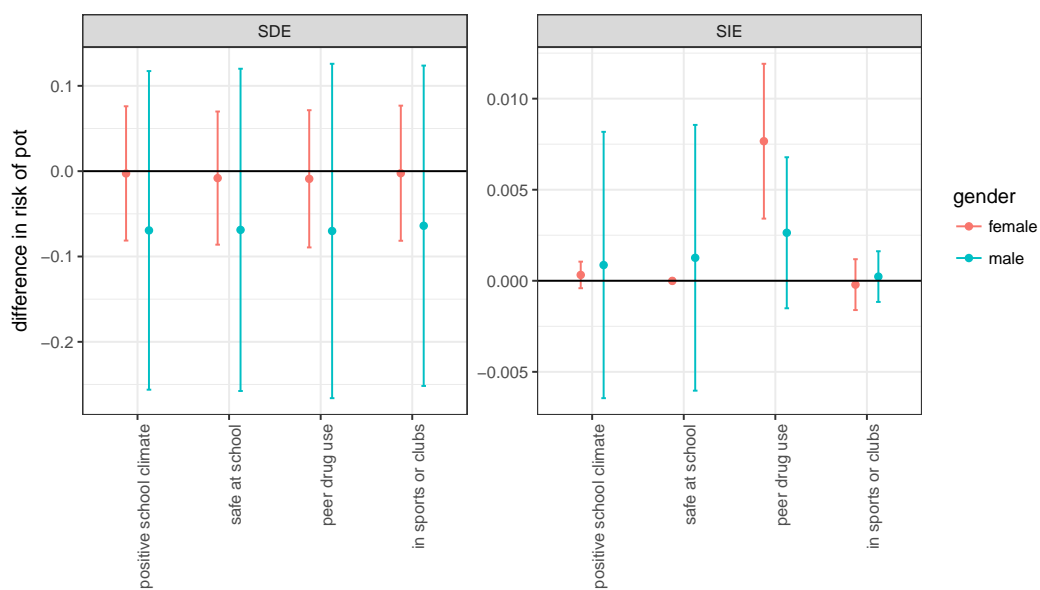

eFigure 8: Data-dependent stochastic direct (SDE) and indirect effect (SIE) estimates and 95% confidence intervals on any marijuana use by mediator, contrasting the restricted voucher group to the control group.

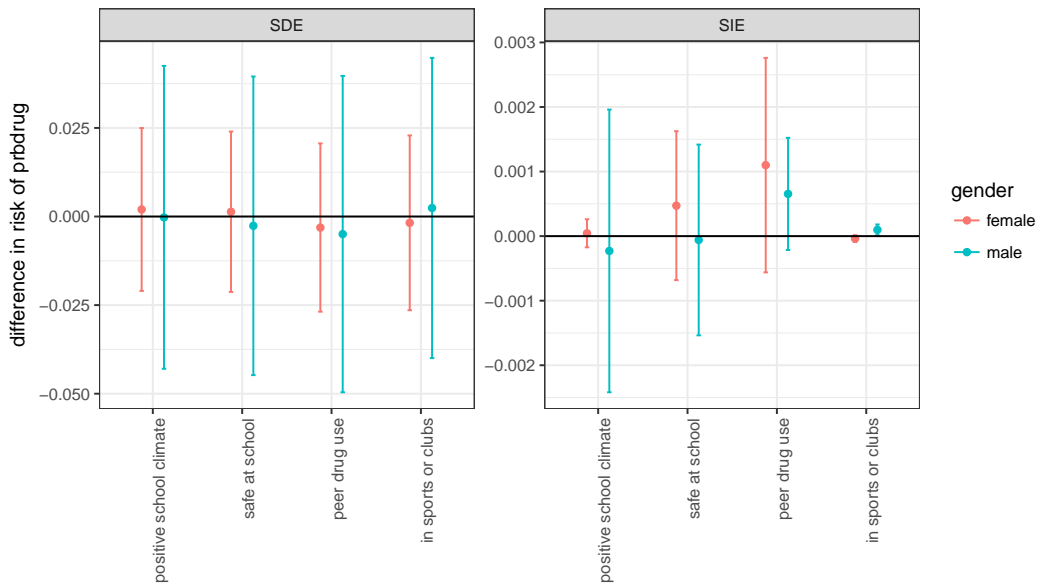

eFigure 9: Data-dependent stochastic direct (SDE) and indirect effect (SIE) estimates and 95% confidence intervals on any problematic drug use by mediator.

### Sensitivity Analysis 3: all sites included

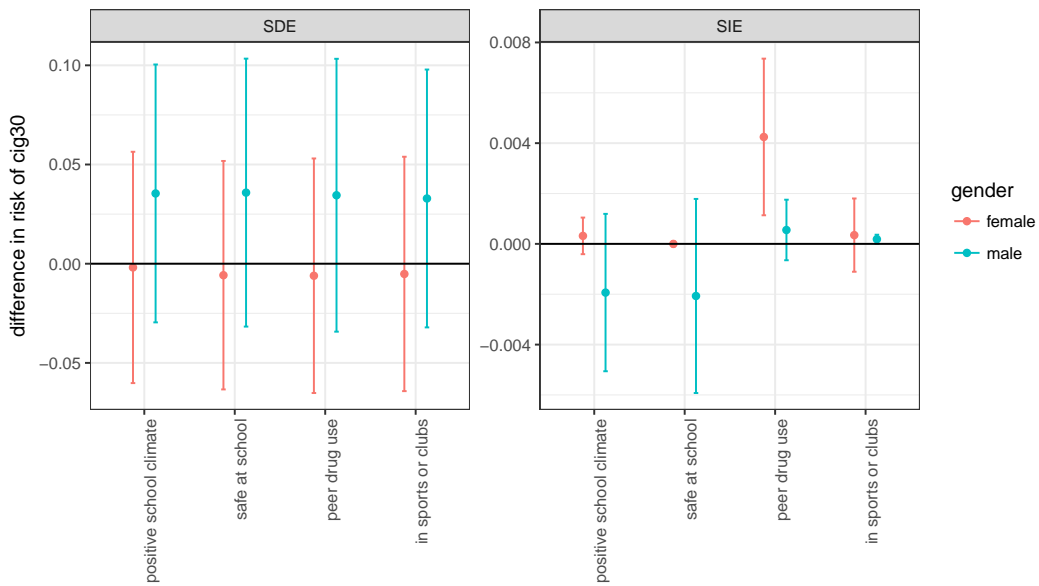

eFigure 10: Data-dependent stochastic direct (SDE) and indirect effect (SIE) estimates and 95% confidence intervals on past 30-day cigarette use by mediator, all sites included.

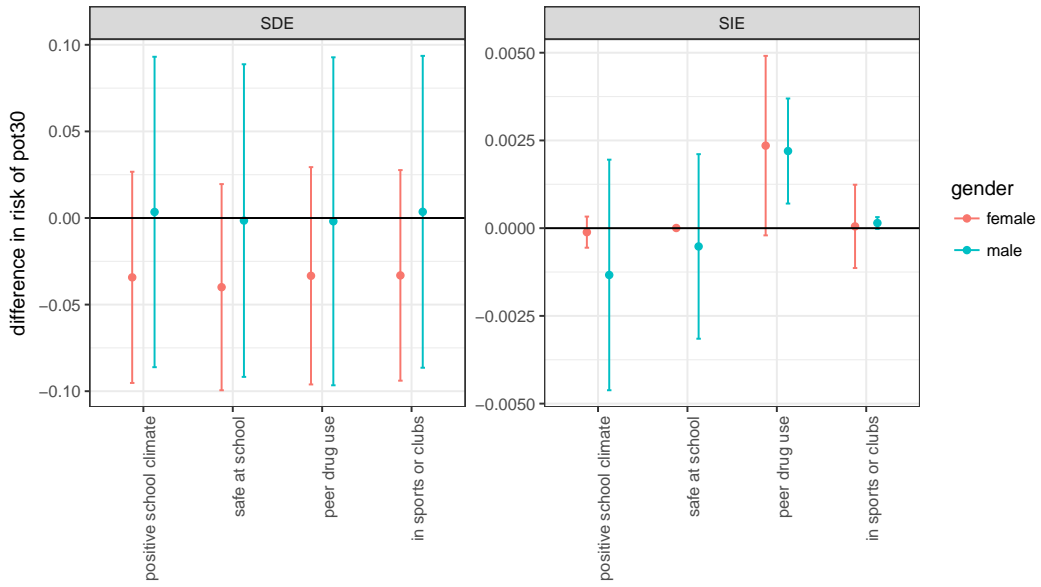

eFigure 11: Data-dependent stochastic direct (SDE) and indirect effect (SIE) estimates and 95% confidence intervals on past 30-day marijuana use by mediator, all sites included.

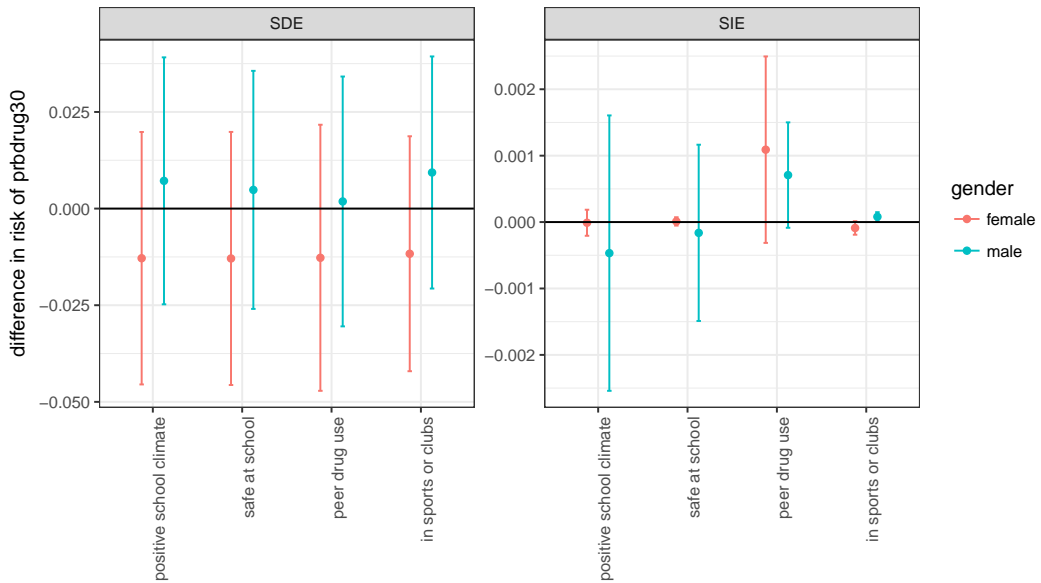

eFigure 12: Data-dependent stochastic direct (SDE) and indirect effect (SIE) estimates and 95% confidence intervals on past 30-day problematic drug use by mediator, all sites included.

## Discussion of small, null mediation effects

The indirect effects we estimated were small—increasing or decreasing the risk of substance use by tenths or hundredths of a percent. There are likely multiple contributors to such small effects. First, the school and peer environment variables we tested may be weak or poorly measured mediators, suggesting important mediators have yet to be identified. Use of the voucher entailed moving to a new neighborhood, and the disruption of moving may have influenced children’s outcomes. In other words, characteristics of the destination neighborhood may not be the only or even the primary mediators of the total effect of randomization. A goal of future research is to examine additional potential mediators, including mediation by the family environment—such as parental mental health and employment and parent-child closeness—and unexamined aspects of the school and peer environments.

Another contributor is weak first-stage effects. As seen in Table 8, receiving a voucher versus not affects the mediator by a maximum RD of 0.048 and a minimum of 0.001. These first-stage effects reflect the path  $A \rightarrow Z \rightarrow M$ , and thus assumes that the effect of  $A$  on  $M$  operates through  $Z$ —moving with the voucher. Although we believe this to be a reasonable assumption, incomplete measurement or mismeasurement of  $Z$  may dilute these effects. For example, a more complete measurement of adherence may include a non-binary  $Z$  that reflects compliance with the intervention over time (e.g., years in the new neighborhood) and/or include multiple  $Z$ s. Such factors suggest that an important area for future work is in extending the stochastic mediation TMLE estimator for non-binary and high-dimensional  $Z$ . Methods that can capture such a complex  $Z$  do not currently exist. Because we do not evaluate multiple  $Z$ ’s, we cannot know which particular aspect of intervention adherence is important in affecting mediator and outcome values.

Another potential explanation for weak first-stage effects could be that families in the voucher group may not have moved far enough away from their baseline neighborhoods to result in a change of school or change in peer social network. MTO resulted in shorter-distance moves than other housing interventions (1). Those in the restricted voucher group were more likely to move farther than those in the unrestricted voucher group, yet only 16% of those in the restricted group moved 10 miles or more (2). This contrasts with those participants in the Gautreaux study where 90% moved 10 miles or more (1; 3; 4). Unfortunately, we do not have information on change in the specific schools for the adolescents, but the majority did not change school districts; 30% of those in the voucher group changed school districts compared to 25% of controls. It is possible that moving greater distances may have strengthened effects on the mediators by affecting the extent to which ties were severed with the baseline neighborhood.

Finally, measurement error in self-reported covariates ( $W$ ), incomplete measurement of the nuances of intervention adherence ( $Z$ ) (discussed above), and measurement error in the self-reported mediator and outcome variables ( $M$  and  $Y$ ) may have both biased our results and reduced power, thereby potentially contributing to very small indirect effects (5). Bias due to measurement error is typically given less attention in the epidemiology

literature than bias due to confounding, despite the equivalency between confounding bias and bias due to covariate measurement error (6). However, measurement error is pervasive. In this study, interviewers offered youth the opportunity to self-administer sections of the in-person computer-assisted survey that addressed sensitive behaviors, and this may have reduced measurement error for illicit behaviors for some adolescents (2). However given that the majority of youth chose not to self-administer the survey, measurement error may be a concern for the mediator and outcome variables, given they were still self-reported in an in-home interview.

Estimating potential biases due to measurement error or conducting sensitivity analyses that adjust effect estimates for the types of measurement error that realistically exist in this study is not feasible, as prior information on each mismeasured variable's measurement error model and the error's joint distribution with all the other variables in the study does not exist. Except in the simple case of ordinary least squares regression with one covariate experiencing classical measurement error, predicting the direction of the bias due to measurement error is complex (5). Consequently, our results may be biased due to measurement error with the degree of bias unknown. Such bias could be a contributing factor to null results.

## Bibliography

- [1] Rosenbaum JE, Zuberi A, Comparing residential mobility programs: design elements, neighborhood placements, and outcomes in mto and gautreaux. *Housing Policy Debate* 2010;20(1):27–41.
- [2] Orr L, Feins J, Jacob R, et al., Moving to opportunity: Interim impacts evaluation 2003;.
- [3] Keels M, Duncan GJ, DeLuca S, et al., Fifteen years later: Can residential mobility programs provide a long-term escape from neighborhood segregation, crime, and poverty. *Demography* 2005;42(1):51–73.
- [4] Keels M, Second-generation effects of chicago's gautreaux residential mobility program on children's participation in crime. *Journal of Research on Adolescence* 2008; 18(2):305–352.
- [5] Carroll RJ, Ruppert D, Stefanski LA, et al., *Measurement error in nonlinear models: a modern perspective*, CRC press2006.
- [6] Rudolph KE, Stuart EA, Using sensitivity analyses for unobserved confounding to address covariate measurement error in propensity score methods. *American Journal of Epidemiology* 2017;In Press.
